# Supplementary material for: A Membrane with Strong Resistance to Organic and Biological Fouling Using Graphene Oxide and D-Tyrosine as Modifiers
Source: MDPI journal article supplement (doi:10.3390/membranes12050486), 2022-04-29
Supplement: s1 [file s1]

# Supplementary Information: A membrane with Strong Resistance to Organic and Biological Fouling Using Graphene Oxide and D-Tyrosine as Modifiers

Jiarui Guo <sup>1,2</sup>, Yan Zhang <sup>1,2,\*</sup>, Fenghua Chen <sup>2</sup> and Yuman Chai <sup>2</sup>

<sup>1</sup> Key Laboratory of Water Quality Science and Water Environment Recovery Engineering, Beijing University of Technology, Beijing 100124, China

<sup>2</sup> Faculty of Architecture, Civil and Transportation Engineering, Beijing University of Technology, Beijing 100124, China; guojiarui@emails.bjut.edu.cn (J.G.); chenfh@cnpe.cc (F.C.); chaiyuman@163.com (Y.C.)

\* Correspondence: yzhang@bjut.edu.cn

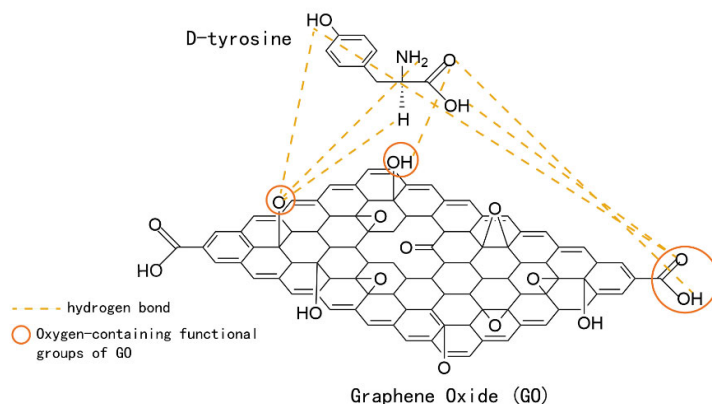

**Figure S1.** Schematic diagram of the Intermolecular hydrogen bonding between GO and D-tyrosine in the membrane matrix.

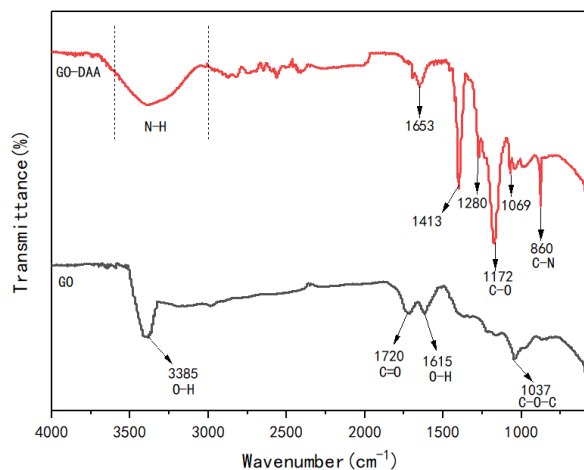

**Figure S2.** FTIR spectra of GO and GO-DAA.

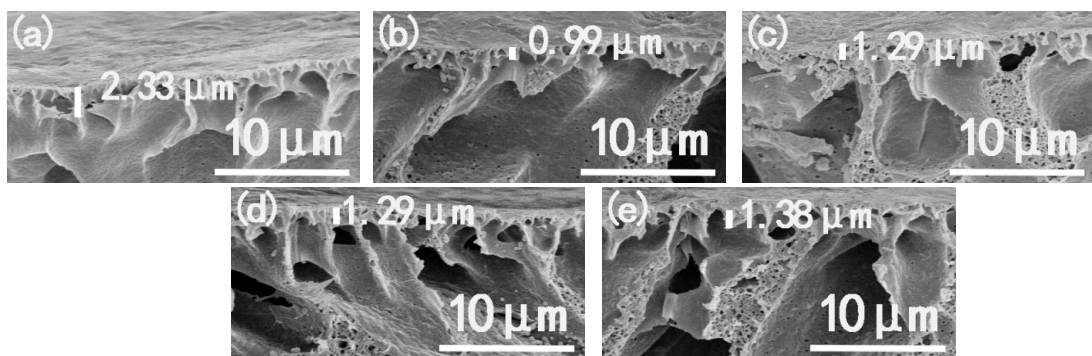

**Figure S3.** The surface layer thickness of the membranes. (a) PVDF; (b) P-GO; (c) P-GO-50; (d) P-GO-100; (e) P-GO-150.

**Table S1.** Components in the polymer casting solutions.

| Membrane    | Substance and concentration |            |             |           |                   |
|-------------|-----------------------------|------------|-------------|-----------|-------------------|
|             | DMAc (wt %)                 | PVP (wt %) | PVDF (wt %) | GO (wt %) | D-tyrosine (mg/L) |
| PVDF        | 80                          | 2          | 18          | /         | /                 |
| P-GO        | 79.8                        | 2          | 18          | 0.2       | /                 |
| P-GO-50DAA  | 79.8                        | 2          | 18          | 0.2       | 50                |
| P-GO-100DAA | 79.8                        | 2          | 18          | 0.2       | 100               |
| P-GO-150DAA | 79.8                        | 2          | 18          | 0.2       | 150               |

**Table S2.** Elemental composition of three membranes' surface.

| Membrane | Atomic percentage (%) |       |      |
|----------|-----------------------|-------|------|
|          | C 1s                  | O 1s  | N 1s |
| PVDF     | 83.05                 | 11.11 | 5.84 |
| P-GO     | 86.54                 | 8.57  | 4.89 |
| P-GO-DAA | 84.69                 | 9.03  | 6.28 |

**Table S3.** Carbon chemical bond composition of three membranes' surface.

| Membrane | Carbon chemical bond (%) |       |       |         |
|----------|--------------------------|-------|-------|---------|
|          | C-C                      | C-F   | C=C   | C-O/C-N |
| PVDF     | 45.04                    | 41.11 | 8     | 5.85    |
| P-GO     | 51.06                    | 30.18 | 11.87 | 6.89    |
| P-GO-DAA | 41.51                    | 30.99 | 16.52 | 10.97   |

**Table S4.** Average pore size and porosity of fouled membranes.

| Membrane    | Average pore size (nm) | Porosity (%) |
|-------------|------------------------|--------------|
| PVDF        | 2.9 (±1.6)             | 16.5 (±1.8)  |
| P-GO        | 7.1 (±1.8)             | 40.1 (±2.6)  |
| P-GO-50DAA  | 9.9 (±2.1)             | 58.8 (±1.8)  |
| P-GO-100DAA | 13.2 (±1.7)            | 72.0 (±2.3)  |
| P-GO-150DAA | 12.3(±1.9)             | 69.6 (±2.1)  |

**Table S5.** Infrared absorption peaks with corresponding chemical bonds.

| <b>Absorption peaks (cm<sup>-1</sup>)</b> | <b>chemical bonds</b>        |
|-------------------------------------------|------------------------------|
| 860                                       | C-N                          |
| 1037                                      | C-O-C                        |
| 1320                                      | O-H (in phenol group)        |
| 1413                                      | N-H                          |
| 1615                                      | O-H                          |
| 1720                                      | C=O                          |
| 3385                                      | O-H (in carboxyl acid group) |
| 3300~3500                                 | N-H                          |
